# Supplementary material for: Determination of the Oxidative Stress Biomarkers of 8-Hydroxydeoxyguanosine and Dityrosine in the Gills, Skin, Dorsal Fin, and Liver Tissue of Atlantic Salmon (Salmo salar) Parr
Source: MDPI journal article supplement (doi:10.3390/toxics10090509), 2022-08-29
Supplement: s1 [file s1]

# Supplementary Materials: Determination of the Oxidative Stress Biomarkers of 8-Hydroxydeoxyguanosine and Dityrosine in the Gills, Skin, Dorsal Fin, and Liver Tissue of Atlantic Salmon (*Salmo salar*) Parr

Junjie Zhang, Eivind B. Sundf r, Rolf Klokkerengen, Susana V. Gonzalez, Vasco C. Mota, Carlo C. Lazado and Alexandros G. Asimakopoulos

**Table S1.** Absolute (AR; N=3 replicates) and relative recoveries (RR; N=3 replicates) of 8OHDG and DIY (Mean  $\pm$  RSD %).

|                                | Method A     |       |             |     | Method B     |              |               |                |
|--------------------------------|--------------|-------|-------------|-----|--------------|--------------|---------------|----------------|
|                                | AR           |       | RR          |     | AR           |              | RR            |                |
|                                | 8OHDG        | DIY   | 8OHDG       | DIY | 8OHDG        | DIY          | 8OHDG         | DIY            |
| First extraction <sup>a</sup>  | 23 $\pm$ 3.9 | 1.10* | 80 $\pm$ 24 | 27* | 59 $\pm$ 5.8 | 72 $\pm$ 4.6 | 101 $\pm$ 11  | 104 $\pm$ 13   |
| Second extraction <sup>a</sup> |              |       |             |     | 18 $\pm$ 1.9 | 25 $\pm$ 1.5 | 100 $\pm$ 10  | 114 $\pm$ 12   |
| Low <sup>b</sup>               |              |       |             |     | 71 $\pm$ 7.2 | 71 $\pm$ 5.7 | 101 $\pm$ 4.7 | 96.3 $\pm$ 1.8 |
| High <sup>b</sup>              |              |       |             |     | 72 $\pm$ 5.1 | 78 $\pm$ 7.8 | 97 $\pm$ 3.1  | 104 $\pm$ 1.5  |

\*Detected in one sample out of the 3 replicates.

<sup>a</sup>These two extractions were based on the medium fortified concentration (10 ng/mL for 8OHDG and 500 ng/mL for DIY)

<sup>b</sup>Low and High represent low (1 ng/mL for 8OHDG and 50 ng/mL for DIY) and high fortified concentrations (100 ng/mL for 8OHDG and 5000 ng/mL for DIY), respectively, and were performed with Method B.

Note: the final extraction protocol is highlighted with green color (method B). The second extraction cycle was not incorporated in method B (see main manuscript).

**Table S2.** Spearman correlations of 8OHDG and DIY concentrations between the 4 tissues.

|            |      |         |            |          |
|------------|------|---------|------------|----------|
| DIY        | skin | gills   | dorsal fin | liver    |
| skin       |      | 0.338** | −0.287**   | −0.030   |
| gills      |      |         | −0.224**   | 0.039    |
| dorsal fin |      |         |            | 0.044    |
| liver      |      |         |            |          |
| 8OHDG      | skin | gills   | dorsal fin | liver    |
| skin       |      | 0.079   | 0.138      | −0.856** |
| gills      |      |         | −0.177     | −0.174   |
| dorsal fin |      |         |            | 0.265    |
| liver      |      |         |            |          |

\*\* :  $p < 0.01$

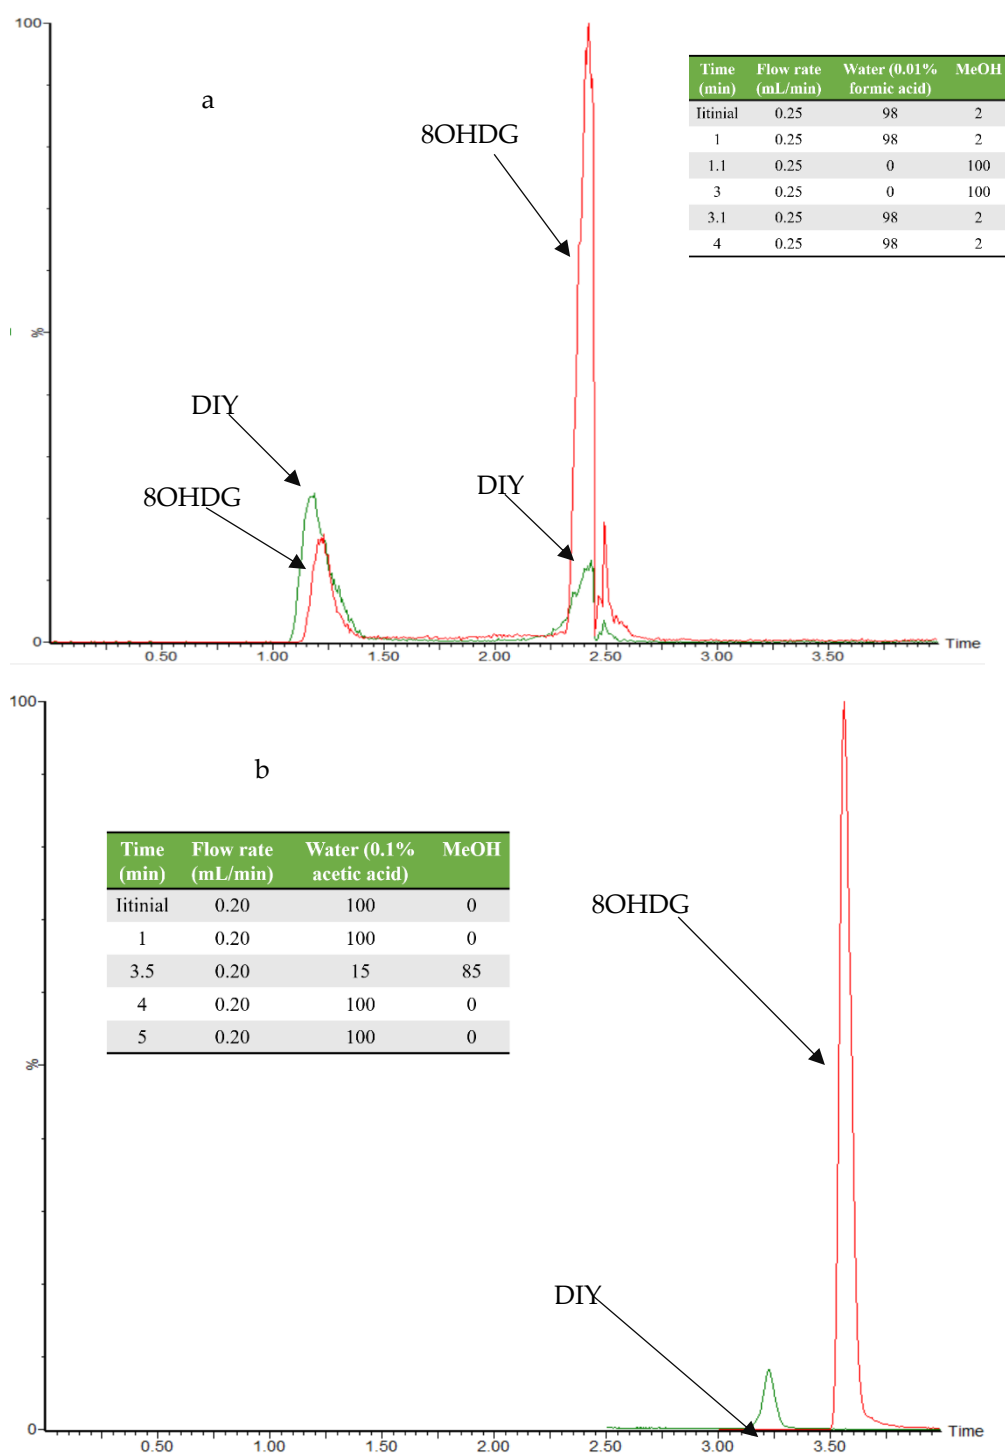

**Figure S1.** Total ion current chromatogram of 8OHDG and DIY separated by Kinetex C18 (30 × 2.1 mm, 1.3 μm) (a) and ACQUITY UPLC HSS T3 (100 × 2.1 mm, 1.7 μm) (b) at a concentration of 10 ng/mL for DIY and 8OHDG in solvent matrix.

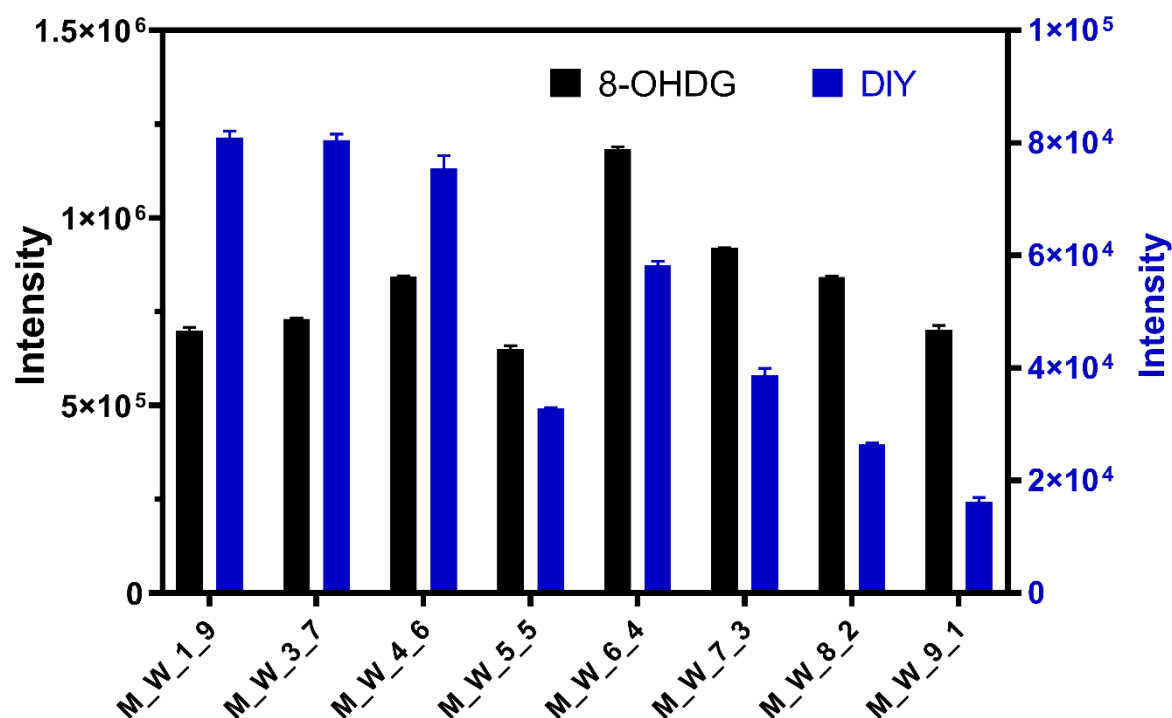

**Figure S2.** The intensity of 8OHDG and DIY in different solvent (M: MeOH; W: water; e.g., M\_W\_1\_9 denotes methanol/water, 1:9 v/v) at a fortified amount of 10 ng for DIY and 8OHDG in solvent matrix.

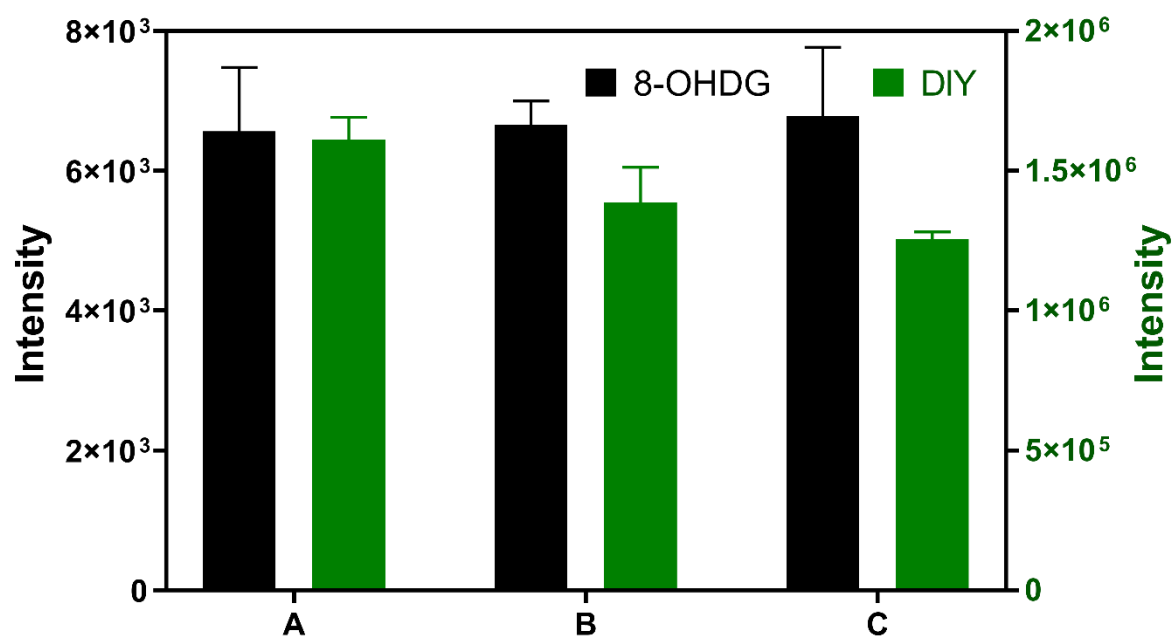

**Figure S3.** The intensity of 8OHDG and DIY in different extracted solutions (A: MeOH with 1% w/v ammonium formate; B: MeOH/Water (1:1 v/v); C: MeOH with 1% v/v formic acid) at a fortification level of 10 ng for DIY and 8OHDG in pooled matrix sample.

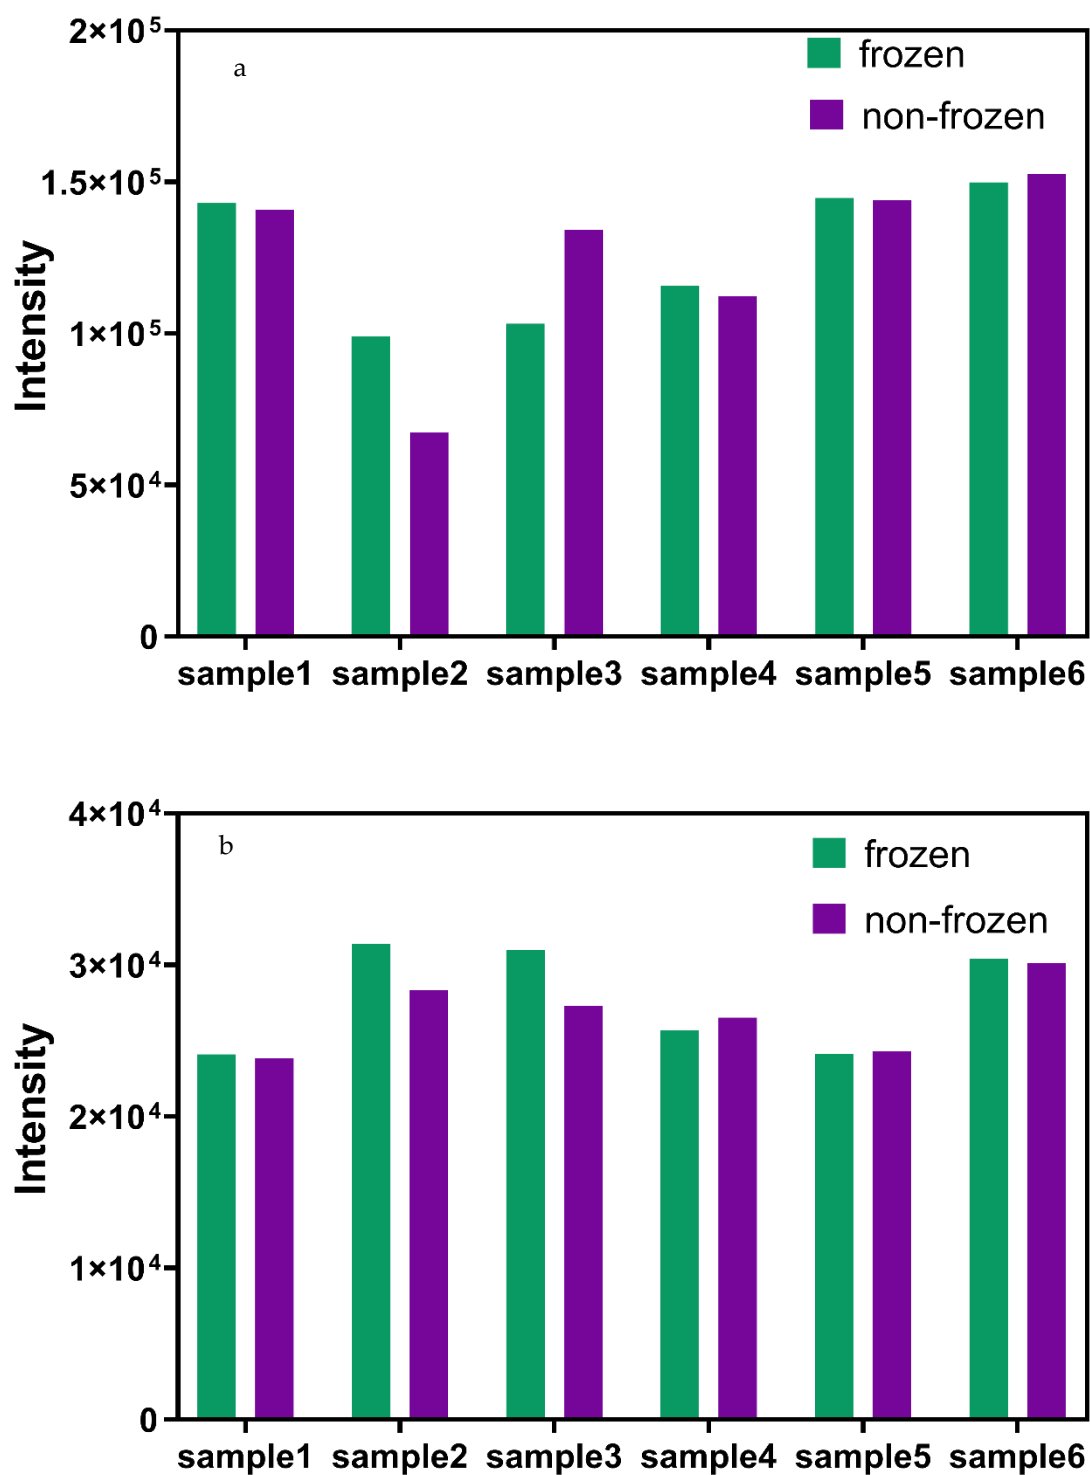

Figure S4. The intensity of  $^{15}\text{N}_5\text{-8OHdG}$  (a) and  $^{13}\text{C}_6\text{-DIY}$  (b) in the samples with freeze and non-freeze treatment.

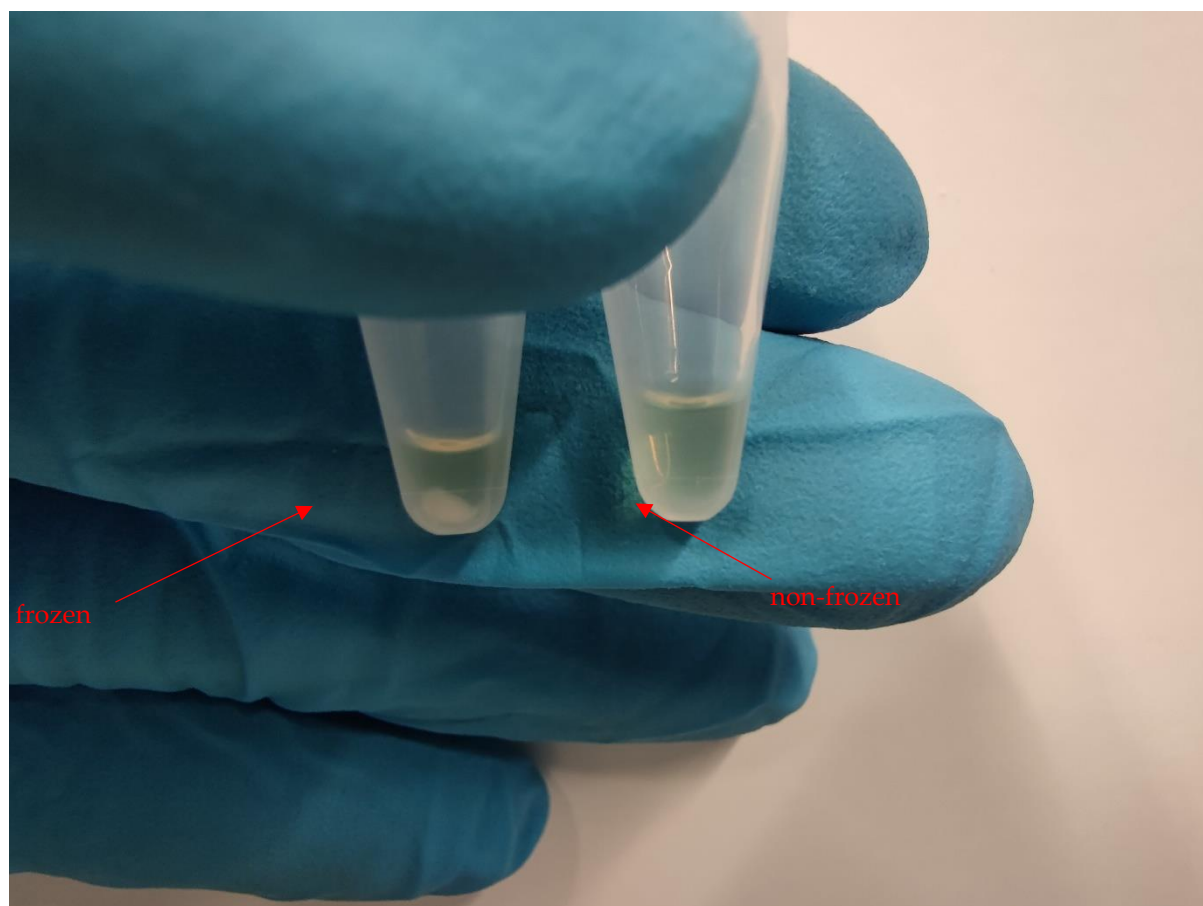

**Figure S5.** The difference of the same sample treated with freeze and non-freeze treatment.
